# Supplementary material for: Spaghetti to a Tree: A Robust Phylogeny for Terebelliformia (Annelida) Based on Transcriptomes, Molecular and Morphological Data
Source: MDPI journal article supplement (doi:10.3390/biology9040073), 2020-04-06
Supplement: s1 [file s1]

## Supplementary Tables

**Supplementary Table S1:** Voucher, sequencing and assembly statistics for the transcriptome dataset. Vouchers for all newly generated transcriptomes were deposited in the Scripps Institution of Oceanography Benthic Invertebrate Collection (SIO-BIC) and are highlighted in bold.

| Species                                                             | Voucher      | SRA<br>Accession   | Tech-<br>nology | Read<br>length | Read pairs<br>raw | Read pairs<br>after<br>trimming | Assembled<br>contigs | Avg contig<br>length | Max contig<br>length | N50  | Number<br>of loci |
|---------------------------------------------------------------------|--------------|--------------------|-----------------|----------------|-------------------|---------------------------------|----------------------|----------------------|----------------------|------|-------------------|
| <i>Alvinella caudata</i>                                            | ---          | SRR3665374         | Hiseq<br>2000   | PE-95          | 4,626,483         | 3,760,880                       | 20,822               | 812                  | 15,017               | 1024 | 3153              |
| <i>Alvinella pompejana</i>                                          | ---          | SRR3665375         | Hiseq<br>2000   | PE-95          | 16,861,102        | 6,072,375                       | 27,023               | 902                  | 17,332               | 1211 | 4133              |
| <b><i>Amphicteis</i> cf.<br/><i>gunneri</i> group 4<sup>2</sup></b> | <b>A9430</b> | <b>SRR11434467</b> | Hiseq<br>4000   | PE-100         | 47,931,393        | 45,147,588                      | 79,401               | 1047                 | 15,778               | 1514 | 6462              |
| <b><i>Amphisamytha</i><br/><i>carldarei</i></b>                     | <b>A7710</b> | <b>SRR11434468</b> | Hiseq<br>4000   | PE-100         | 39,266,357        | 33,542,842                      | 63,988               | 1031                 | 18,592               | 1545 | 6187              |
| <b><i>Anobothrus</i> sp.<sup>3</sup></b>                            | <b>A9432</b> | <b>SRR11434464</b> | Hiseq<br>4000   | PE-100         | 38,399,649        | 35,811,389                      | 71,665               | 1101                 | 9,772                | 1641 | 6713              |
| <b><i>Eupolymnia</i><br/><i>crassicornis</i></b>                    | <b>A9448</b> | <b>SRR11434465</b> | Hiseq<br>4000   | PE-100         | 39,305,953        | 35,735,791                      | 71,807               | 1512                 | 16,618               | 2497 | 7534              |
| <i>Hypania invalida</i>                                             | ---          | SRR5590961         | Hiseq<br>2500   | PE-100         | 26,364,747        | 22,683,566                      | 41,519               | 1281                 | 25,342               | 2035 | 7099              |
| <i>Lanice conchilega</i>                                            | ---          | SRR5590962         | Hiseq<br>2500   | PE-100         | 7,153,766         | 6,973,497                       | 44,774               | 948                  | 17,627               | 1333 | 6427              |
| <b><i>Loimia</i><br/><i>bermudensis</i></b>                         | <b>A9451</b> | <b>SRR11434463</b> | Hiseq<br>4000   | PE-100         | 54,545,318        | 51,897,892                      | 66,423               | 1228                 | 13,748               | 1901 | 7073              |
| <b><i>Melinna oculata</i></b>                                       | <b>A9440</b> | <b>SRR11434462</b> | Hiseq<br>4000   | PE-100         | 44,374,579        | 41,684,736                      | 86,098               | 901                  | 16,402               | 1247 | 5522              |
| <i>Nautalvinella<br/>irlander<sup>1</sup></i>                       | ---          | SRR3665379         | Hiseq<br>2000   | PE-70          | 7,167,558         | 6,601,237                       | 16,730               | 711                  | 10,137               | 821  | 1913              |
| <b><i>Neoamphitrite</i><br/><i>robusta</i></b>                      | <b>A9453</b> | <b>SRR11434461</b> | Hiseq<br>4000   | PE-100         | 47,743,495        | 43,663,803                      | 83,037               | 1390                 | 17,418               | 2331 | 7505              |

|                                            |              |                    |               |        |             |             |         |      |        |      |      |
|--------------------------------------------|--------------|--------------------|---------------|--------|-------------|-------------|---------|------|--------|------|------|
| <i>Paralvinella fijiensis</i>              | ---          | SRR3665376         | Hiseq<br>2500 | PE-100 | 163,263,771 | 155,327,397 | 99,518  | 1315 | 29,173 | 2306 | 7268 |
| <i>Paralvinella grasslei</i>               | ---          | SRR3665377         | Hiseq<br>2000 | PE-95  | 29,031,987  | 20,798,332  | 43,837  | 1113 | 23,838 | 1696 | 5895 |
| <b><i>Paralvinella palmiformis</i></b>     | <b>A7728</b> | <b>SRR11434460</b> | Hiseq<br>4000 | PE-100 | 40,277,701  | 34,514,297  | 58,263  | 1212 | 23,449 | 2003 | 6220 |
| <i>Pectinaria gouldii</i>                  | ---          | SRR2057036         | Hiseq<br>2000 | PE     | 72,926,891  | 59,462,937  | 71,643  | 856  | 10,890 | 1099 | 3090 |
| <b><i>Polycirrus carolinensis</i></b>      | <b>A9444</b> | <b>SRR11434459</b> | Hiseq<br>4000 | PE-100 | 29,062,749  | 26,915,272  | 62,519  | 1241 | 10,594 | 1976 | 6622 |
| <b><i>Terebellides</i> sp.<sup>4</sup></b> | <b>A9465</b> | <b>SRR11434458</b> | Hiseq<br>4000 | PE-100 | 51,852,071  | 48,406,436  | 72,743  | 1174 | 16,512 | 1792 | 6972 |
| <i>Thelepus</i> n.sp.                      | A5916        | SRR2017640         | HiSeq<br>2000 | PE-100 | 41,581,952  | 37,783,007  | 86,315  | 456  | 16,862 | 505  | 3580 |
| <b><i>Trichobranchus roseus</i></b>        | <b>A9467</b> | <b>SRR11434466</b> | Hiseq<br>4000 | PE-100 | 28,421,080  | 26,141,416  | 64,372  | 1107 | 10,169 | 1704 | 6064 |
| <i>Arenicola marina</i>                    | ---          | SRR2005653         | HiSeq<br>1000 | PE-100 | 68,660,484  | 61,371,936  | 101,276 | 638  | 19,851 | 687  | 4109 |

<sup>1</sup>On NCBI SRA as *Paralvinella pandorae irlandei*. Our results indicate that it should be *Nautalvinella irlandei*.

<sup>2</sup>*Amphicteis gunneri* forms a cryptic species complex. This specimen falls in group 4 of an unpublished assessment (Jon Kongsrud, pers. comm.).

<sup>3</sup>This is an undescribed species informally called EP-B (Jon Kongsrud, pers. comm.).

<sup>4</sup>*Terebellides* is a cryptic species complex (Nygren et al. 2018) in the Atlantic. This specimen corresponds to species 25 in group C of Nygren et al. 2018.

**Supplementary Table S2:** Sequence and voucher information for Sanger-sequenced taxa. Sequences created for this study are highlighted in bold. Collection codes starting with A are from Scripps Institution of Oceanography Benthic Invertebrate Collection (SIO-BIC); collection codes starting with W are from the Australian Museum; CDF: Charles Darwin Foundation for the Galapagos Islands; ZMBN: Natural History Collections, University Museum of Bergen, Norway.

| Taxon                                                                                | Collection site    | Voucher     | COI             | 16S             | 18S             | 28S             | H3              |
|--------------------------------------------------------------------------------------|--------------------|-------------|-----------------|-----------------|-----------------|-----------------|-----------------|
| <b>Alvinellidae</b>                                                                  |                    |             |                 |                 |                 |                 |                 |
| <i>Alvinella caudata</i> Desbruyères & Laubier 1986                                  | East Pacific Rise  | A1092       | JX423737        | JX423669        | JX423641        | <b>MT166914</b> | <b>MT166723</b> |
| <i>Alvinella caudata</i> Desbruyères & Laubier 1986                                  | East Pacific Rise  | ---         | SRR3665374      | SRR3665374      | SRR3665374      | SRR3665374      | ---             |
| <i>Alvinella pompejana</i> Desbruyères & Laubier 1980                                | East Pacific Rise  | A9429       | AY645983        | <b>MT166794</b> | <b>MT166855</b> | FP517935        | <b>MT166724</b> |
| <i>Alvinella pompejana</i> Desbruyères & Laubier 1980                                | East Pacific Rise  | ---         | SRR3665375      | SRR3665375      | SRR3665375      | SRR3665375      | ---             |
| <i>Nautalvinella irlandei</i> <sup>1</sup> (Desbruyères & Laubier 1986)              | East Pacific Rise  | ---         | SRR3665379      | SRR3665379      | SRR3665379      | SRR3665379      | ---             |
| <i>Nautalvinella pandorae</i> (Desbruyères & Laubier 1986)                           | Juan de Fuca Ridge | A1105       | DQ270466        | <b>MT166826</b> | <b>MT166884</b> | <b>MT166916</b> | <b>MT166764</b> |
| <i>Paralvinella fijiensis</i> Desbruyères & Laubier 1993                             | Lau Back-Arc Basin | ZMBN10 6600 | MG270110        | MG253099        | MG253145        | ---             | ---             |
| <i>Paralvinella fijiensis</i> Desbruyères & Laubier 1993                             | Lau Back-Arc Basin | ---         | SRR3665376      | SRR3665376      | SRR3665376      | SRR3665376      | SRR3665376      |
| <i>Paralvinella grasslei</i> Desbruyères & Laubier 1982                              | East Pacific Rise  | A1093A      | <b>MT167009</b> | <b>MT166824</b> | AY577886        | X80654          | <b>MT166762</b> |
| <i>Paralvinella grasslei</i> Desbruyères & Laubier 1982                              | East Pacific Rise  | ---         | SRR3665377      | SRR3665377      | SRR3665377      | SRR3665377      | SRR3665377      |
| <i>Paralvinella palmiformis</i> Desbruyères & Laubier 1986                           | Juan de Fuca Ridge | A1104       | <b>MT167010</b> | <b>MT166825</b> | AF168747        | <b>MT166915</b> | <b>MT166763</b> |
| <i>Paralvinella palmiformis</i> Desbruyères & Laubier 1986                           | Juan de Fuca Ridge | A7728       | SRR11434460     | SRR11434460     | SRR11434460     | SRR11434460     | SRR11434460     |
| <i>Paralvinella sulfincola</i> Desbruyères & Laubier 1993 in Tunnicliffe et al. 1993 | Juan de Fuca Ridge | ---         | FJ976042        | FJ976042        | JN936461        | ---             | ---             |
| <b>Ampharetidae</b>                                                                  |                    |             |                 |                 |                 |                 |                 |

# Ampharetinae

|                                                               |                               |                   |                 |                 |                 |                 |                 |
|---------------------------------------------------------------|-------------------------------|-------------------|-----------------|-----------------|-----------------|-----------------|-----------------|
| <i>Amage auricula</i> Malmgren 1866                           | Norwegian Sea                 | ZMBN 99281        | ---             | MG253079        | MG253131        | ---             | ---             |
| <i>Amage sculpta</i> Ehlers 1908                              | Antarctica                    | ---               | ---             | MG253117        | MG253162        | ---             | ---             |
| <i>Amagopsis klugei</i> Pergament & Khlebovich 1964           | Norwegian Sea                 | ZMBN 95455        | MG270108        | ---             | MG253173        | ---             | ---             |
| <i>Ampharete acutifrons</i> (Grube 1860)                      | Iceland                       | ---               | HM473718        | DQ779601        | ---             | DQ779673        | DQ779715        |
| <i>Ampharete falcata</i> Eliason 1955                         | Norway, Skagerrak             | ZMBN 95443        | MG270099        | MG253124        | MG253169        | ---             | ---             |
| <i>Ampharete finnarchica</i> (Sars 1864)                      | Svalbard, Spitsbergen         | A1100             | JX423738        | JX423670        | JX423642        | <b>MT166917</b> | <b>MT166726</b> |
| <i>Amphicteis dalmatica</i> Hutchings & Rainer 1979           | Australia, New South Wales    | W199656           | AF342678        | ---             | ---             | AF342693        | AF342700        |
| <i>Amphicteis gunneri</i> (Sars 1835)                         | Norway, Glesvær               | ZMBN 121368       | MG270125        | MG253105        | MG253150        | ---             | ---             |
| <i>Amphicteis</i> cf. <i>gunneri</i> group 2 <sup>2</sup>     | Norway, Trondheim fjord       | A1107             | <b>MT166980</b> | <b>MT166796</b> | <b>MT166856</b> | <b>MT166918</b> | <b>MT166727</b> |
| <i>Amphicteis</i> cf. <i>gunneri</i> group 4 <sup>3</sup>     | Sweden, Koster area           | A9430             | SRR11434467     | SRR11434467     | SRR11434467     | SRR11434467     | SRR11434467     |
| <i>Amphicteis obscurior</i> Chamberlin 1919                   | Mexico, Gulf of California    | A9431             | <b>MT166981</b> | <b>MT166797</b> | ---             | <b>MT166919</b> | <b>MT166728</b> |
| <i>Amphicteis ninonae</i> Jirkov 1985                         | Svalbard, Spetsbergen         | ZMBN 95441        | KX497038        | KX513561        | ---             | ---             | ---             |
| <i>Amphisamytha carldarei</i> Stiller et al. 2013             | Juan de Fuca Ridge            | A7710             | SRR11434468     | SRR11434468     | SRR11434468     | SRR11434468     | SRR11434468     |
| <i>Amphisamytha jacksoni</i> Stiller et al. 2013 <sup>4</sup> | Galapagos Ridge               | CDF NA067-0 45-05 | <b>MT166982</b> | <b>MT166798</b> | <b>MT166857</b> | <b>MT166920</b> | <b>MT166729</b> |
| <i>Amythas membranifera</i> Benham 1921                       | Scotia Arc                    | A2947             | <b>MT166983</b> | <b>MT166799</b> | <b>MT166858</b> | <b>MT166921</b> | <b>MT166730</b> |
| <i>Anobothrus gracilis</i> (Malmgren 1866)                    | Norway, Trondheim fjord       | A1106             | JX423739        | JX423671        | JX423643        | AF501670        | <b>MT166731</b> |
| <i>Anobothrus laubieri</i> (Desbruyères 1978)                 | ---                           | ZMBN 89833        | ---             | MG253080        | MG253132        | ---             | ---             |
| <i>Anobothrus</i> sp. EP-B <sup>5</sup>                       | USA, California, Whale "Ruby" | A9432             | SRR11434464     | SRR11434464     | SRR11434464     | SRR11434464     | SRR11434464     |
| <i>Asabellides californica</i> Hilbig 2000                    | ---                           | A9433             | <b>MT166986</b> | <b>MT166802</b> | <b>MT166860</b> | <b>MT166922</b> | <b>MT166734</b> |

|                                                             |                                   |                    |                 |                 |                 |                 |                 |
|-------------------------------------------------------------|-----------------------------------|--------------------|-----------------|-----------------|-----------------|-----------------|-----------------|
| <i>Auchenoplax crinita</i> Ehlers 1887                      | USA, New England                  | ---                | FJ976041        | FJ976041        | DQ790077        | DQ790026        | ---             |
| <i>Auchenoplax worsfoldi</i> Jirkov & Leontovich 2013       | Mauritania                        | ZMBN 95430         | MG270100        | MG253118        | MG253165        | ---             | ---             |
| <i>Eclysippe eliasoni</i> (Day 1973)                        | Norway, Trondheim fjord           | A1108              | JX423766        | JX423678        | JX423648        | <b>MT166924</b> | <b>MT166737</b> |
| <i>Eclysippe vanelli</i> (Fauvel 1936)                      | Mauritania                        | ZMBN 95433         | MG270103        | MG253119        | MG253166        | ---             | ---             |
| <i>Glyphanostomum pallescens</i> (Théel 1879)               | Iceland                           | ---                | MG270091        | MG253092        | MG253142        | ---             | ---             |
| <i>Grassleia</i> cf. <i>hydrothermalis</i> Solís-Weiss 1993 | Mexico, Gulf of California        | A6137              | KX497032        | KX513552        | KX13568         | ---             | ---             |
| <i>Hypania invalida</i> (Grube 1860)                        | Germany, Magdeburg                | ---                | SRR5590961      | SRR5590961      | ---             | SRR5590961      | SRR5590961      |
| <i>Lysippe labiata</i> Malmgren 1866                        | Svalbard, Billefjord              | A9434 / ZMBN 95444 | <b>MT167003</b> | MG253125        | <b>MT166876</b> | <b>MT166925</b> | <b>MT166752</b> |
| <i>Mugga wahrbergi</i> Eliason 1955                         | Sweden, Gullmarsfjorden           | A1118              | JX423768        | JX423680        | JX423650        | <b>MT166926</b> | <b>MT166757</b> |
| <i>Neosabellides elongatus</i> (Ehlers 1912)                | Scotia Arc                        | A9435              | <b>MT167007</b> | <b>MT166821</b> | <b>MT166881</b> | <b>MT166927</b> | <b>MT166759</b> |
| <i>Neosabellides lizae</i> Alvestad & Budaeva 2015          | Australia, Lizard Island          | W45180             | MG270089        | ---             | MG253134        | ---             | ---             |
| <i>Noanelia</i> sp. A                                       | Icelandic Basin                   | ---                | MG270121        | MG253098        | MG253144        | ---             | ---             |
| <i>Paralysippe annectens</i> (Moore 1923)                   | USA, California, "Fossil Hill"    | A9436              | <b>MT167011</b> | <b>MT166827</b> | <b>MT166885</b> | <b>MT166928</b> | <b>MT166765</b> |
| <i>Paramytha ossicola</i> Queirós et al. 2016               | Portugal, Setúbal Canyon          | ZMBN 107234        | ---             | KX513549        | KX513565        | ---             | ---             |
| <i>Paramytha schanderi</i> Kongsrud et al. 2016             | Mid-Atlantic Ridge, Loki's Castle | ZMBN 87820         | KX497035        | KX513555        | KX513571        | ---             | ---             |
| <i>Pavelius smileyi</i> Kongsrud et al. 2016                | Mid-Atlantic Ridge, Loki's Castle | ZMBN 87807         | KX497034        | KX513554        | KX513570        | ---             | ---             |
| <i>Pavelius uschakovi</i> Kuznetsov & Levenstein 1988       | Russia, Okhotsk Sea               | ZMBN 108241        | KX497033        | KX513553        | KX513569        | ---             | ---             |
| <i>Pavelius</i> sp. EP-B <sup>6</sup>                       | USA, Oregon, Hydrate Ridge        | A1980 / A2065      | <b>MT167012</b> | <b>MT166828</b> | <b>MT166886</b> | <b>MT166923</b> | <b>MT166766</b> |
| <i>Sabellides octocirrata</i> (Sars 1835)                   | Norway, Trondheim fjord           | A1109              | JX423770        | JX423682        | JX423652        | <b>MT166929</b> | <b>MT166778</b> |

|                                                    |                                |                  |                 |                 |                 |                 |                 |
|----------------------------------------------------|--------------------------------|------------------|-----------------|-----------------|-----------------|-----------------|-----------------|
| <i>Samnytha sexcirrata</i> (Sars 1856)             | Norway,<br>Trondheim fjord     | A1110            | <b>MT167021</b> | <b>MT166839</b> | <b>MT166897</b> | <b>MT166930</b> | <b>MT166779</b> |
| <i>Samnythella neglecta</i> Wollebaek<br>1912      | Norwegian Sea                  | ZMBN<br>99276    | MG270113        | KX513551        | KX513567        | ---             | ---             |
| <i>Sosane sulcata</i> Malmgren 1866                | Sweden,<br>Vattenholmen        | A1120            | MG270078        | <b>MT166841</b> | <b>MT166899</b> | <b>MT166931</b> | <b>MT166781</b> |
| <i>Sosane wireni</i> (Hessle 1917)                 | Norway, Bergen<br>area         | ZMBN<br>95447    | KX497039        | KX513562        | KX513577        | ---             | ---             |
| <b>Melinnidae</b>                                  |                                |                  |                 |                 |                 |                 |                 |
| <i>Isolda bipinnata</i> Fauchald<br>1977           | Belize                         | A9437            | <b>MT166993</b> | <b>MT166809</b> | <b>MT166867</b> | <b>MT166932</b> | <b>MT166742</b> |
| <i>Isolda pulchella</i> Müller in<br>Grube 1858    | Morocco                        | ZMBN<br>105697   | MG270120        | MG253082        | MG253136        | ---             | ---             |
| <i>Melinna albicincta</i> Mackie &<br>Pleijel 1995 | Norway,<br>Trondheim Fjord     | A1113            | JX423767        | JX423679        | JX423649        | <b>MT166933</b> | <b>MT166753</b> |
| <i>Melinna cristata</i> (Sars 1851)                | Sweden, Gullmaren              | A9438            | GQ229117        | DQ779624        | <b>MT166877</b> | <b>MT166934</b> | <b>MT166754</b> |
| <i>Melinna heterodonta</i> (Moore<br>1923)         | USA, California                | A4546            | <b>MT167004</b> | <b>MT166818</b> | <b>MT166878</b> | <b>MT166935</b> | <b>MT166755</b> |
| <i>Melinna oculata</i> Hartman<br>1969             | USA, California                | A9439            | <b>MT167005</b> | <b>MT166819</b> | <b>MT166879</b> | <b>MT166936</b> | <b>MT166756</b> |
| <i>Melinna oculata</i> Hartman<br>1969             | USA, California                | A9440            | SRR11434462     | SRR11434462     | SRR11434462     | SRR11434462     | ---             |
| <b>Pectinariidae</b>                               |                                |                  |                 |                 |                 |                 |                 |
| <i>Pectinaria auricoma</i> (Müller<br>1776)        | Sweden,<br>Kristineberg        | A1004            | <b>MT167013</b> | DQ319857        | <b>MT166887</b> | AF501668        | <b>MT166767</b> |
| <i>Pectinaria gouldii</i> (Verrill<br>1874)        | ---                            | ---              | FJ976040        | FJ976040        | DQ790091        | DQ790054        | ---             |
| <i>Pectinaria gouldii</i> (Verrill<br>1874)        | Massachusetts, USA             | ---              | SRR2057036      | SRR2057036      | SRR2057036      | SRR2057036      | ---             |
| <i>Pectinaria granulata</i> (Linné<br>1767)        | Iceland                        | A9441            | HQ970907        | <b>MT166829</b> | AY577890        | DQ209239        | <b>MT166768</b> |
| <i>Pectinaria hyperborea</i><br>(Malmgren, 1866)   | Russia,<br>Kandalaksha Bay     | WS0244/<br>WS668 | GU672461        | ---             | ---             | ---             | KP113607        |
| <i>Pectinaria koreni</i> (Malmgren<br>1866)        | English Channel /<br>North Sea | ---              | DQ319528        | DQ319865        | JN936463        | ---             | ---             |
| <i>Petta pusilla</i> Malmgren 1866                 | Sweden,<br>Kostergrund         | A1122            | <b>MT167014</b> | <b>MT166830</b> | <b>MT166888</b> | <b>MT166937</b> | <b>MT166769</b> |
| <b>Terebellidae</b>                                |                                |                  |                 |                 |                 |                 |                 |
| <b>Terebellinae</b>                                |                                |                  |                 |                 |                 |                 |                 |

|                                                                |                               |       |             |             |             |             |             |
|----------------------------------------------------------------|-------------------------------|-------|-------------|-------------|-------------|-------------|-------------|
| <i>Amaeana trilobata</i> (Sars 1863)                           | Norway,<br>Trondheimsfjord    | A9442 | MT166979    | MT166795    | ---         | MT166938    | MT166725    |
| <i>Artacama crassa</i> Hartman<br>1967                         | Scotia Arc                    | A3151 | MT166984    | MT166800    | MT166859    | MT166947    | MT166732    |
| <i>Artacama proboscidea</i><br>Malmgren 1866                   | Sweden,<br>Kostergrund        | A1125 | MT166985    | MT166801    | AY344666    | MT166948    | MT166733    |
| <i>Axionice maculata</i> (Dalyell<br>1853)                     | Svalbard,<br>Hinlopenstretet  | A1097 | MT166987    | MT166803    | MT166861    | MT166949    | MT166735    |
| <i>Biremis</i> cf. <i>blandi</i> Polloni et al.<br>1973        | Mexico, Alarcon<br>Rise       | A7707 | MT166988    | MT166804    | MT166862    | MT166939    | MT166736    |
| <i>Eupolyinnia crassicornis</i><br>(Schmarda 1861)             | Belize                        | A9446 | MT166989    | MT166805    | MT166863    | MT166950    | MT166738    |
| <i>Eupolyinnia crassicornis</i><br>(Schmarda 1861)             | Belize                        | A9448 | SRR11434465 | SRR11434465 | SRR11434465 | SRR11434465 | SRR11434465 |
| <i>Eupolyinnia nebulosa</i><br>(Montagu 1818)                  | France, Banyuls               | A1080 | MT166990    | MT166806    | MT166864    | MT166951    | MT166739    |
| <i>Eupolyinnia rullieri</i><br>Londoño-Mesa, 2009              | Belize                        | A9447 | MT166991    | MT166807    | MT166865    | MT166952    | MT166740    |
| <i>Hauchiella renilla</i> Hutchings<br>& Glasby 1986           | Australia, South<br>Australia | A1116 | MT166992    | MT166808    | MT166866    | MT166940    | MT166741    |
| <i>Lanassa venusta</i> (Malm 1874)                             | Svalbard, Raudfjord           | A1099 | MT166994    | MT166810    | MT166868    | MT166953    | MT166743    |
| <i>Lanice conchilega</i> (Pallas 1766)                         | England, Scilly<br>Islands    | A1115 | MT166995    | AY340466    | X79873      | AY340403    | MT166744    |
| <i>Lanice conchilega</i> (Pallas 1766)                         | France, Roscoff               | ---   | SRR5590962  | SRR5590962  | SRR5590962  | SRR5590962  | ---         |
| <i>Lanicola lobata</i><br>Hartmann-Schröder 1986               | Australia, Tasmania           | A9450 | MT166997    | MT166812    | MT166870    | MT166955    | MT166746    |
| <i>Laphania boeckii</i> Malmgren<br>1866                       | Svalbard, Billefjord          | A1095 | MT166998    | MT166813    | MT166871    | MT166956    | MT166747    |
| <i>Leaena ebranchiata</i> (Sars 1865)                          | Svalbard, Billefjord          | A1094 | MT166999    | MT166814    | MT166872    | MT166957    | MT166748    |
| <i>Loimia bermudensis</i> Verrill<br>1900                      | Belize                        | A9451 | MT167000    | MT166815    | MT166873    | MT166958    | MT166749    |
| <i>Loimia bermudensis</i> Verrill<br>1900                      | Belize                        | A9451 | SRR11434463 | SRR11434463 | SRR11434463 | SRR11434463 | SRR11434463 |
| <i>Loimia salazari</i><br>Londoño-Mesa &<br>Carrera-Parra 2005 | ---                           | ---   | AY040704    | ---         | AY040690    | ---         | ---         |
| <i>Loimia minuta</i> Treadwell 1929                            | Belize                        | A9452 | MT167001    | MT166816    | MT166874    | MT166959    | MT166750    |

|                                                                  |                                |                |             |             |             |             |             |
|------------------------------------------------------------------|--------------------------------|----------------|-------------|-------------|-------------|-------------|-------------|
| <i>Lysilla</i> cf. <i>pacifica</i> Hessle 1917                   | New Caledonia,<br>Lifou Island | A1114          | MT167002    | MT166817    | MT166875    | MT166941    | MT166751    |
| <i>Neoamphitrite affinis</i><br>(Malmgren 1866)                  | Sweden,<br>Gullmarsfjord       | A1117          | MT167006    | MT166820    | MT166880    | MT166960    | MT166758    |
| <i>Neoamphitrite robusta</i><br>(Johnson 1901)                   | USA, California                | A9453          | SRR11434461 | SRR11434461 | SRR11434461 | SRR11434461 | SRR11434461 |
| <i>Paraeupolyinnia carus</i> Young<br>& Kritzler 1987            | Belize                         | A9449          | MT166996    | MT166811    | MT166869    | MT166954    | MT166745    |
| <i>Pista australis</i> Hutchings &<br>Glasby 1988                | Australia, New<br>South Wales  | W24390         | AF342682    | ---         | ---         | AF185159    | AF185242    |
| <i>Pista cristata</i> (Müller 1776)                              | Norway,<br>Trondhejmsfjord     | ZMBN<br>116032 | MG270116    | MG253107    | MG253153    | ---         | ---         |
| <i>Polycirrus arcticus</i> Sars 1865                             | Svalbard, Billefjord           | A1096          | MT167015    | MT166831    | MT166889    | MT166942    | MT166770    |
| <i>Polycirrus californicus</i> Moore<br>1909                     | USA, California                | A9443          | MT167016    | MT166832    | MT166890    | MT166943    | MT166771    |
| <i>Polycirrus carolinensis</i> Day<br>1973                       | Belize                         | A1101          | ---         | MT166833    | MT166891    | MT166944    | MT166772    |
| <i>Polycirrus carolinensis</i> Day<br>1973                       | Belize                         | A9444          | SRR11434459 | SRR11434459 | SRR11434459 | SRR11434459 | SRR11434459 |
| <i>Polycirrus eximius</i> (Leidy<br>1855)                        | USA, North<br>Carolina         | A9445          | MT167017    | MT166834    | MT166892    | MT166945    | MT166773    |
| <i>Polycirrus norvegicus</i><br>Wollebæk 1912                    | Norway,<br>Trondheim fjord     | A1111          | ---         | MT166835    | MT166893    | MT166946    | MT166774    |
| <i>Proclea malmgreni</i> (Ssolowiew<br>1899)                     | Sweden, Singlefjord            | A1121          | MT167018    | MT166836    | MT166894    | MT166961    | MT166775    |
| <i>Reteterebella</i> cf. <i>aloba</i><br>Hutchings & Glasby 1988 | ---                            | A9454          | MT167019    | MT166837    | MT166895    | MT166962    | MT166776    |
| <i>Scionella lornensis</i> Pearson<br>1969                       | Sweden,<br>Gullmarsfjord       | A1119          | MT167022    | MT166840    | MT166898    | MT166963    | MT166780    |
| <i>Spinosphaera hutchingsae</i><br>Londoño-Mesa 2004             | Belize                         | A9455          | MT167023    | MT166842    | MT166900    | MT166964    | MT166782    |
| <i>Terebella lapidaria</i> Linnaeus<br>1767                      | England, English<br>Channel    | A1102          | JX423771    | JX423683    | JX423653    | MT166965    | MT166785    |
| Thelepodinae                                                     |                                |                |             |             |             |             |             |
| <i>Rhinothelepus lobatus</i><br>Hutchings 1974                   | Australia, New<br>South Wales  | W49044         | MT167020    | MT166838    | MT166896    | MT166966    | MT166777    |
| <i>Streblosoma kaia</i> Reuscher et                              | North Fiji Basin,              | A9456          | MT167024    | MT166843    | MT166901    | MT166967    | MT166783    |



|                                             |                    |         |             |             |             |             |             |
|---------------------------------------------|--------------------|---------|-------------|-------------|-------------|-------------|-------------|
| al. 2011                                    | White Lady         |         |             |             |             |             |             |
| <i>Streblosoma pacifica</i> Hilbig          | USA, California    | A9457   | MT167025    | MT166844    | MT166902    | MT166968    | MT166784    |
| 2001                                        |                    |         |             |             |             |             |             |
| <i>Thelepus antarcticus</i> Kinberg         | Scotia Arc         | A2944   | MT167028    | MT166847    | MT166905    | MT166969    | MT166788    |
| 1866                                        |                    |         |             |             |             |             |             |
| <i>Thelepus australiensis</i>               | Australia,         | A9458   | MT167029    | MT166848    | MT166906    | MT166970    | MT166789    |
| Hutchings & Smith 1997                      | Whitsunday Islands |         |             |             |             |             |             |
| <i>Thelepus cincinnatus</i>                 | Norway,            | A9460/  | MT167031    | DQ779636    | AY611462    | DQ779712    | DQ779769    |
| (Fabricius 1780)                            | Trondheim fjord    | SMNH    |             |             |             |             |             |
|                                             |                    | 81625   |             |             |             |             |             |
| <i>Thelepus</i> cf. <i>pascua</i> (Fauchald | Indonesia, Raja    | A9459   | MT167030    | MT166849    | MT166907    | MT166971    | MT166790    |
| 1977)                                       | Ampat              |         |             |             |             |             |             |
| <i>Thelepus</i> n.sp.                       | USA, California    | A5916   | SRR2017640  | SRR2017640  | SRR2017640  | SRR2017640  | SRR2017640  |
| <i>Thelepus</i> n.sp.2                      | USA, California    | A9461   | MT167032    | MT166850    | MT166908    | MT166972    | MT166791    |
| <i>Thelepus verrilli</i> (Treadwell         | Belize             | A9462   | MT167033    | MT166851    | MT166909    | ---         | MT166792    |
| 1911)                                       |                    |         |             |             |             |             |             |
| Trichobranchidae                            |                    |         |             |             |             |             |             |
| <i>Octobranchus lingulatus</i>              | France, Banyuls    | A1103   | MT167008    | MT166822    | MT166882    | MT166974    | MT166760    |
| (Grube 1863)                                |                    |         |             |             |             |             |             |
| <i>Octobranchus</i> sp. <sup>7</sup>        | USA, California,   | A9463   | ---         | MT166823    | MT166883    | MT166973    | MT166761    |
|                                             | Whale Pedro        |         |             |             |             |             |             |
| <i>Terebellides atlantis</i> Williams       | South of Iceland   | SMF     | MG025259    | MG025491    | ---         | MG025418    | ---         |
| 1984                                        |                    | 24678   |             |             |             |             |             |
| <i>Terebellides bigeniculatus</i>           | South of Iceland   | SMF     | MG025318    | MG025500    | ---         | MG025427    | ---         |
| Parapar, Moreira & Helgason                 |                    | 24636   |             |             |             |             |             |
| 2011                                        |                    |         |             |             |             |             |             |
| <i>Terebellides gracilis</i> Malm           | Norway             | NTU-V   | MG024998    | MG025452    | ---         | MG025368    | ---         |
| 1874                                        |                    | M-68196 |             |             |             |             |             |
| <i>Terebellides irinae</i> Gagaev           | Arctic Ocean       | ZMBN    | MG025342    | MG025506    | ---         | MG025432    | ---         |
| 2009                                        |                    | 116500  |             |             |             |             |             |
| <i>Terebellides shetlandica</i>             | Sweden,            | A1143   | MT167026    | MT166845    | MT166903    | MT166976    | MT166786    |
| Parapar, Moreira & O'Reilly                 | Kristineberg       |         |             |             |             |             |             |
| 2016                                        |                    |         |             |             |             |             |             |
| <i>Terebellides</i> sp. LA1 <sup>8</sup>    | USA, California    | A9464   | MT167027    | MT166846    | MT166904    | MT166975    | MT166787    |
| <i>Terebellides</i> sp. <sup>9</sup>        | USA, Washington    | A9465   | SRR11434458 | SRR11434458 | SRR11434458 | SRR11434458 | SRR11434458 |
| <i>Terebellides stroemii</i> Sars 1835      | Skagerrak, North   | ZMBN    | MG025097    | MG025462    | ---         | MG025380    | ---         |
|                                             | Sea                | 116344  |             |             |             |             |             |
| <i>Terebellides williamsae</i> Jirkov       | Barents Sea        | ZMBN    | MG024977    | MG025448    | ---         | MG025363    | ---         |
| 1989                                        |                    | 116258  |             |             |             |             |             |

|                                                                 |                            |       |                 |                 |                 |                 |                 |
|-----------------------------------------------------------------|----------------------------|-------|-----------------|-----------------|-----------------|-----------------|-----------------|
| <i>Trichobranchus</i> cf.<br><i>bibranchiatus</i> Moore 1903    | Indonesia, Raja Ampat      | A7289 | <b>MT167034</b> | <b>MT166852</b> | <b>MT166910</b> | <b>MT166977</b> | <b>MT166793</b> |
| <i>Trichobranchus hancocki</i><br>(Hartman 1955)                | USA, California            | A9466 | <b>MT167035</b> | <b>MT166853</b> | <b>MT166911</b> | ---             | ---             |
| <i>Trichobranchus roseus</i> (Malm 1874)                        | Sweden, Gasoriken          | A1084 | <b>MT167036</b> | <b>MT166854</b> | <b>MT166912</b> | <b>MT166978</b> | ---             |
| <i>Trichobranchus roseus</i> (Malm 1874)                        | Sweden, Koster area        | A9467 | SRR11434466     | SRR11434466     | SRR11434466     | SRR11434466     | SRR11434466     |
| <i>Trichobranchus tribranchiata</i><br>(Hutchings & Peart 2000) | Australia, South Australia | A1123 | <b>MT167037</b> | DQ779605        | <b>MT166913</b> | DQ779677        | DQ779720        |
| <b>Outgroup</b>                                                 |                            |       |                 |                 |                 |                 |                 |
| <i>Arenicola marina</i> (Linnaeus 1758)                         | ---                        | ---   | HQ691225        | HQ691210        | HQ691215        | HQ691220        | DQ779718        |

<sup>1</sup>On NCBI SRA as *Paralvinella pandorae irlandei*. Our results indicate that it should be *Nautalvinella irlandei*.

<sup>2</sup>*Amphicteis gunneri* forms a cryptic species complex. This specimen falls in group 2 of an unpublished assessment (Jon Kongsrud, pers. comm.).

<sup>3</sup>*Amphicteis gunneri* forms a cryptic species complex. This specimen falls in group 4 of an unpublished assessment (Jon Kongsrud, pers. comm.).

<sup>4</sup>We are thankful to the Ocean Exploration Trust as well as the pilots and crew aboard the E/V Nautilus during cruise NA064 for their assistance in sample collection and exploration using the Hercules ROV. Further acknowledgements and thanks go out to the Charles Darwin Foundation and the Galapagos National Park Directorate for their collaboration and assistance in the exploration of the Galapagos Platform conducted under research permit No. PC-45-15. We also gratefully recognize the Government of Ecuador via the Ecuadorian Navy for permission to operate in their territorial waters.

<sup>5</sup>This is an undescribed species informally called *Anobothrus* sp. EP-B (Jon Kongsrud, pers. comm.).

<sup>6</sup>This is an undescribed species informally called *Pavelius* sp. EP-B (Jon Kongsrud, pers. comm.).

<sup>7</sup>This is an undescribed species that has been informally referred to as “*Bizzarobranchus*” or “*genus B*” (SCAMIT, <https://preview.tinyurl.com/wmmnv5>).

<sup>8</sup>This is an undescribed species that has been informally referred to as *Terebellides* “sp. LA1” (SCAMIT Newsletter Vol 25(5), <https://preview.tinyurl.com/tqayhud>).

<sup>9</sup>*Terebellides* is a cryptic species complex (Nygren et al. 2018) in the Atlantic. This specimen corresponds to species 25 in group C of Nygren et al. 2018.
